# Supplementary material for: Fluorescent Indicators For Biological Imaging of Monatomic Ions
Source: Front Cell Dev Biol. 2022 Apr 27;10:885440. doi: 10.3389/fcell.2022.885440 (PMC9093666; doi:10.3389/fcell.2022.885440)
Supplement: Supplementary file 1 [file DataSheet1.docx]

Supplementary Table S1. Spectral and biophysical properties of selected GECIs.

The parameters listed are peak absorbance wavelength (λabs), extinction coefficient (EC), peak emission wavelength (λem), quantum yield (QY), brightness (the product of EC and QY), dissociation constant (*K*d), Hill coefficient (nH), *in vitro* Ca2+-dependent responses (∆*R*/*R*0 for ratiometric-pericam, GEM-GECO1, GEX-GECO1, and REX-GECO1; ∆*F*/*F*0 for others; negative numbers indicate inverse indicators), fluorescence response for a single action potential, and apparent acid dissociation constant (p*K*a). Some parameters are provided for both the Ca2+-free and Ca2+-bound states. NR, not reported.

| name | Ca2+ | λabs (nm) | EC (M-1 cm-1) | λem (nm) | QY | Brightness (mM-1cm-1) | *K*d (nM) | nH | *in vitro* ∆*F*/*F*0 or ∆*R*/*R*0[[1]](#footnote-1) | ∆*F*/*F*0 for 1 AP | p*K*a | References |
| --- | --- | --- | --- | --- | --- | --- | --- | --- | --- | --- | --- | --- |
| Camgaroo | - | 400/490 | NR | ~520 | NR | NR | 7000 | 1.6 | 6 | NR | 10.1 | (Baird et al., 1999, 199) |
| + | NR | NR | NR | 8.9 |
| Flash-pericam | - | 403 | 26800 | 514 | 0.04 | 1.07 | 700 | 0.7 | 7 | NR | NR | (Nagai et al., 2001) |
| 488 | 6300 | NR | NR | NR |
| + | 410 | 21200 | 514 | 0.2 | 4.24 | NR |
| 494 | 16900 | NR | NR | NR |
| Ratiometric-pericam | - | 418 | 24100 | 511 | 0.3 | 7.23 | 1700 | 1.1 | 9 | NR | NR | (Nagai et al., 2001) |
| 494 | 4100 | NR | NR | NR |
| + | 415 | 20500 | 517 | 0.18 | 3.69 | NR |
| 494 | 10300 | NR | NR | NR |
| Inverse-pericam | - | 503 | 59000 | 515 | 0.64 | 37.76 | 200 | 1 | -0.49 | NR | NR | (Nagai et al., 2001) |
| + | 490 | 44000 | 513 | 0.44 | 19.36 | NR |
| G-CaMP | − | 409 | 1100 | NR | NR | NR | 235 | 3.3 | 3.5 | NR | 8.1 | (Nakai et al., 2001) |
| 488 | 570 | 510 | 0.03 | 0.02 |
| + | 410 | 690 | NR | NR | NR | 7.1 |
| 487 | 1400 | 510 | 0.05 | 0.07 |
| G-CaMP1.6 | − | 404 | 5800 | NR | NR | NR | 146 | 3.8 | 3.9 | NR | 8.8 | (Ohkura et al., 2005) |
| 489 | 1100 | 510 | 0.56 | 0.62 |
| + | 403 | 5200 | NR | NR | NR | 8.2 |
| 488 | 3800 | 509 | 0.79 | 3.00 |
| G-CaMP2 | − | 400 | 11100 | NR | NR | NR | 146 | NR | ~4 | NR | NR | (Tallini et al., 2006) |
| 491 | 5200 | 511 | 0.7 | 3.64 |
| + | 401 | 5800 | NR | NR | NR | NR |
| 487 | 19000 | 508 | 0.93 | 17.67 |
| GCaMP3 | - | 399 | 36000 | NR | NR | NR | 405 | 2.1 | 11.3 | 0.20 | 8.4 | (Tian et al., 2009; Dana et al., 2019) |
| 496 | 11000 | 513 | 0.2 | 2.20 |
| + | 399 | 20000 | NR | NR | NR | 7.0 |
| 496 | 50000 | 513 | 0.44 | 22.00 |
| GCaMP5A | - | NR | NR | NR | NR | NR | 307 | 2.7 | 16.4 | NR | 8.7 | (Akerboom et al., 2012) |
| + | 497 | 56100 | NR | 0.65 | 36.47 | 6.8 |
| GCaMP5D | - | NR | NR | NR | NR | NR | 730 | 2.5 | 21.0 | NR | 8.9 | (Akerboom et al., 2012) |
| + | 497 | 25300 | NR | 0.67 | 16.95 | 7.4 |
| GCaMP5G | - | NR | NR | NR | NR | NR | 460 | 2.5 | 31.7 | 0.37 | 9.1 | (Akerboom et al., 2012; Dana et al., 2019) |
| + | 497 | 49300 | NR | 0.67 | 33.03 | 7.0 |
| G-GECO1.2 | - | 402 | 37000 | NR | NR | NR | 1150 | 2.1 | 22.0 | NR | 10.4 | (Zhao et al., 2011) |
| 498 | 2000 | 513 | 0.25 | 0.50 |
| + | 402 | 22000 | NR | NR | NR | 7.2 |
| 498 | 33000 | 513 | 0.36 | 11.90 |
| GEM-GECO1 | - | 397 | 34000 | 511 | 0.31 | 10.20 | 340 | 2.9 | 109.0 | NR | 6.2 | (Zhao et al., 2011) |
| + | 390 | 36000 | 455 | 0.18 | 6.50 |
| GEX-GECO1 | - | 392 | 32000 | NR | NR | NR | 318 | 2.8 | 25.0 | 1.21 | 6.7 | (Zhao et al., 2011; Dana et al., 2019) |
| 482 | 0 | 512 | 0.21 | 6.70 |
| + | 390 | 32000 | 506 | 0.19 | 6.08 | 6.1 |
| 482 | 2500 | 506 | 0.39 | 0.98 |
| B-GECO0.1 | - | 378 | 22000 | 446 | 0.02 | 0.44 | 164 | 2.6 | 6.0 | NR | 5.0 | (Zhao et al., 2011) |
| + | 378 | 23000 | 446 | 0.18 | 4.10 | 5.6 |
| GCaMP6s | - | 505 | 2910 | NR | NR | NR | 144 | 2.9 | 62.2 | 0.23 | 9.8 | (Chen et al., 2013) |
| + | 497 | 68500 | 515 | 0.61 | 41.79 | 6.2 |
| GCaMP6m | - | 505 | 20700 | NR | NR | NR | 167 | 3.0 | 37.1 | 0.13 | 8.7 | (Chen et al., 2013) |
| + | 497 | 38200 | 515 | 0.61 | 23.30 | 6.9 |
| GCaMP6f | - | 505 | 2800 | NR | NR | 1.65 | 375 | 2.3 | 50.8 | 0.19 | 8.8 | (Chen et al., 2013) |
| + | 497 | 61900 | 515 | 0.59 | 36.52 | 6.3 |
| jGCaMP7s | - | NR | 5554 | NR | 0.58 | 3.22 | 68 | 2.5 | 39.4 | 0.657 | 7.7 | (Dana et al., 2019) |
| + | NR | 70117 | NR | 0.65 | 45.58 | 6.4 |
| jGCaMP7f | - | NR | 2358 | NR | 0.47 | 1.11 | 174 | 2.3 | 29.2 | 0.316 | 7.9 | (Dana et al., 2019) |
| + | NR | 56028 | NR | 0.59 | 33.06 | 6.5 |
| jGCaMP7b | - | NR | 5668 | NR | 0.59 | 3.34 | 82 | 3.1 | 21.1 | 0.406 | 7.8 | (Dana et al., 2019) |
| + | NR | 56562 | NR | 0.6 | 33.94 | 6.4 |
| jGCaMP7c | - | NR | 1541 | NR | 0.5 | 0.77 | 298 | 2.4 | 144.6 | 0.223 | 8.7 | (Dana et al., 2019) |
| + | NR | 49566 | NR | 0.59 | 29.24 | 6.7 |
| XCaMP-G | - | 398 | 50100 | 512 | 0.14 | 1.8 | 200 | 1.8 | 10.1 | 1.97 | 7.2 | (Inoue et al., 2019; Zhang et al., 2021) |
| 487 | 13200 |
| + | 399 | 36600 | 514 | 0.39 | 19.9 | 8.4 |
| 487 | 51400 |
| XCaMP-Gf | - | 401 | 97280 | 514 | 0.18 | 0.9 | 115 | 1.4 | 11.7 | 2.05 | 6.1 | (Inoue et al., 2019; Zhang et al., 2021) |
| 492 | 5220 |
| + | 394 | 82390 | 514 | 0.5 | 11.4 | 8.7 |
| 492 | 22530 |
| XCaMP-Y | - | 418 | 47300 | 525 | 0.11 | 1.7 | 81 | 1.5 | 6.2 | NR | 7.5 | (Inoue et al., 2019) |
| 498 | 16000 |
| + | 415 | 34500 | 527 | 0.26 | 12.3 | 9.4 |
| 503 | 47400 |
| jGCaMP8s | - | 496 | 2120 | 513 | NR | NR | 46 | 2.2 | 49.5 | NR | 7.7 | (Zhang et al., 2021) |
| + | 57000 | NR | NR | 6.5 |
| jGCaMP8f | - | 496 | 1930 | 512 | NR | NR | 334 | 2.1 | 78.8 | 3.1 | 7.7 | (Zhang et al., 2021) |
| + | 51000 | NR | NR | 6.7 |
| jGCaMP8m | - | 496 | 2250 | 512 | NR | NR | 108 | 1.9 | 45.7 | 5.0 | 7.4 | (Zhang et al., 2021) |
| + | 50000 | NR | NR | 6.7 |
| mNG-GECO1 | + | 496 | 102000 | 513 | 0.69 | 70.38 | 807 | NR | 44 | NR | NR | (Zarowny et al., 2020) |
| NCaMP7 | - | 402/406 | 46600 | 520 | 0.048 | 2.2368 | 96 | 2.2 | 88 | NR | 5.4/6.6 | (Subach et al., 2020) |
| + | 509/512 | 110000 | 522 | 0.52 | 57.2 | NR | 6.18 |
| R-GECO1 | - | 445 | 22000 | NR | NR | NR | 482 | 2.06 | 15.0 | NR | 8.9 | (Zhao et al., 2011) |
| 577 | 15000 | 600 | 0.06 | 0.72 |
| + | 445 | 9000 | NR | NR | NR | 6.6 |
| 561 | 51000 | 589 | 0.2 | 10.20 |
| R-GECO1.2 | - | 564 | 2800 | 595 | 0.16 | 0.45 | 1200 | 2.79 | 32.0 | NR | 8.9 | (Wu et al., 2013) |
| + | 556 | 52000 | 585 | 0.29 | 15.10 | 6.0 |
| O-GECO1 | - | 545 | 1400 | 570 | 0.07 | 0.10 | 1500 | 2.06 | 145.0 | NR | 9.4 | (Wu et al., 2013) |
| + | 543 | 65000 | 564 | 0.22 | 14.30 | 6.1 |
| CAR-GECO1 | - | 565 | 2500 | 620 | 0.11 | 0.28 | 490 | 2.01 | 26.0 | NR | 9.1 | (Wu et al., 2013) |
| + | 560 | 36000 | 609 | 0.21 | 7.60 | 5.7 |
| REX-GECO1 | - | 582 | 26000 | 600 | 0.06 | 1.60 | 240 | 1.8 | 99.0 | NR | 6.5 | (Wu et al., 2014) |
| + | 480 | 28000 | 585 | 0.23 | 6.40 |
| RCaMP1f | - | 574 | 17400 | 597 | 0.11 | 1.91 | 1900 | 2.80 | 11.3 | NR | 4.6 | (Akerboom et al., 2013) |
| + | 572 | 58900 | 592 | 0.48 | 28.27 | 5.3 |
| RCaMP1h | - | 575 | 18700 | 602 | 0.14 | 2.62 | 1300 | 2.50 | 9.0 | NR | 3.2/4.7/6.5 | (Akerboom et al., 2013) |
| + | 571 | 65100 | 594 | 0.51 | 33.20 | 4.9 |
| RCaMP2 | - | 445 | 28288 | NR | NR | NR | 69 | 1.2 | 3.8 | 0.09 | 8.7 | (Inoue et al., 2015) |
| 576 | 14200 | 591 | 0.11 | 1.59 |
| + | 445 | 16600 | NR | NR | NR | 6.1 |
| 563 | 48100 | 583 | 0.23 | 11.2 |
| jRCaMP1a | - | ~575 | 33800 | ~600 | NR | NR | 214 | 0.86 | 2.2 | 0.15 | 5.6 | (Dana et al., 2016) |
| + | ~570 | 54100 | ~595 | NR | NR | 6.4 |
| jRCaMP1b | - | ~575 | 25300 | ~600 | NR | NR | 712 | 1.6 | 6.2 | 0.09 | 6.4 | (Dana et al., 2016) |
| + | ~570 | 53400 | ~595 | NR | NR | 5.5 |
| jRGECO1a | - | ~580 | 61800 | ~600 | NR | NR | 148 | 1.9 | 10.6 | 0.3 | 8.6 | (Dana et al., 2016) |
| + | ~570 | 53300 | ~590 | NR | NR | 6.3 |
| XCaMP-R | - | 444 | 51600 | 598 | 0.14 | 3.3 | 97 | 1.1 | 5.6 | NR | 6.1 | (Inoue et al., 2019) |
| 574 | 37700 |
| + | 452 | 37900 | 593 | 0.28 | 21.7 | 8.7 |
| 561 | 76300 |
| K-GECO1 | - | 568 | 19000 | 594 | 0.12 | 2.28 | 165 | 1.12 | 11 | NR | NR | (Shen et al., 2018) |
| + | 565 | 61000 | 590 | 0.45 | 27.45 | NR |
| NIR-GECO1 | - | 678 | 62000 | 704 | 0.063 | 3.906 | 885 | 1.03 | -0.90 | -0.045 | 6.03 | (Qian et al., 2019) |
| + | 678 | 20000 | 704 | 0.019 | 0.38 | 4.68 |
| NIR-GECO2 | - | NR | 67000 | NR | 0.059 | 3.953 | 331 | 0.94 | -0.94 | -0.16 | 5.26 | (Qian et al., 2020) |
| + | NR | 18000 | NR | 0.014 | 0.252 | 4.85 |
| NIR-GECO2G | - | NR | 74000 | NR | 0.061 | 4.514 | 480 | 0.78 | -0.90 | -0.17 | 5.34 | (Qian et al., 2020) |
| + | NR | 21000 | NR | 0.021 | 0.441 | 4.84 |

Supplementary Table S2. Physical properties of selected small molecule-based Mg2+ indicators.

The parameters listed are peak absorbance wavelength (λabs), extinction coefficient (EC), peak emission wavelength (λem), and apparent dissociation constant (*K*d) for Mg2+ and Ca2+. Some parameters were provided at both Mg2+-free and Mg2+-bound states.

| name | Mg2+ | λabs (nm) | EC (M-1cm-1) | λem (nm) | *K*d for Mg2+ (mM) | *K*d for Ca2+ (µM) | References |
| --- | --- | --- | --- | --- | --- | --- | --- |
| mag-fura-2 | - | 369 | 22,000 | 511 | 1.5 | 53 | (Raju et al., 1989, 1; Meuwis et al., 1998) |
| + | 330 | 24,000 | 491 |
| mag-fura-5 | - | 369 | 23,000 | 505 | 2.3 | 28 | (Illner et al., 1992; Claflin et al., 1994) |
| + | 332 | 25,000 | 482 |
| mag-indo-1 | - | 349 | 38,000 | 480 | 2.7 | 35 | (Csernoch et al., 1998) |
| + | 330 | 33,000 | 417 |
| mag-fluo-4 | - | 490 | 74,000 | NR | 4.7 | 22 | (Zhao et al., 1996; Lee et al., 2009) |
| + | 493 | 75,000 | 517 |
| Magnesium Green | - | 506 | 77,000 | 531 | 1.0 | 6 | (Zhao et al., 1996; Shmigol et al., 2001) |
| + | 506 | 75,000 | 531 |
| + | 578 | 82,000 | 603 |
| KMG-104-AsH | - | 520 | NR | 540 | 1.7 | 100 | (Fujii et al., 2014) |
| + | 521 | NR | 540 |

Supplementary Table S3. Key properties of selected small molecule-based and genetically encodable pH indicators

The parameters listed are peak absorbance wavelength (λabs), extinction coefficient (EC), peak emission wavelength (λem), quantum yield (QY), isosbestic wavelength (λiso), dissociation constant (*K*d), Hill coefficient (nH), and *in vitro* fluorescent responses (∆*R*/*R*0 as (*R*basic-*R*acidic)/*R*acidic for r-pHluorin, where *R* is calculated as *F*475nm/*F*395nm, or ∆*F*/*F*0 as (*F*basic-*F*acidic)/*F*acidic for others). Some parameters are provided for both acidic and basic conditions.NR, not reported. NA, not applicable.

| name | pH | λabs (nm) | EC (M-1cm-1) | λem (nm) | QY | λiso (nm) | p*K*a | nH | ∆*F*/*F*0  or ∆*R*/*R*0[[2]](#footnote-2) | References |
| --- | --- | --- | --- | --- | --- | --- | --- | --- | --- | --- |
| **Small molecule-based pH indicators** | | | | | | | | | | |
| BCECF | acidic | 470 | NR | NR | NR | 440 | 6.98 | NR | NR | (Rink et al., 1982) |
| 505 | NR | 535 | NR |
| basic | 470 | NR | NR | NR |
| 505 | NR | 520 | NR |
| SNARF-1 | acidic | 515 | 17700 | 583 | 0.03 | 521 | 7.62 | NR | NR | (Whitaker et al., 1991) |
| 544 | 21600 |
| basic | 573 | 44100 | 631 | 0.09 |
| SNARF-2 | acidic | 518 | 20500 | 584 | 0.03 | 530 | 7.43, 7.50 | NR | NR | (Whitaker et al., 1991) |
| 550 | 24400 |
| basic | 576 | 46400 | 633 | 0.16 |
| C.SNARF-1 | acidic | 518 | 23200 | 585 | 0.047 | 534 | 7.6 | NR | NR | (Whitaker et al., 1991) |
| 548 | 25700 |
| basic | 575 | 44900 | 637 | 0.09 |
| C.SNARF-2 | acidic | 516 | 26200 | 585 | 0.02 | 524 | 7.70, 7.78 | NR | NR | (Whitaker et al., 1991) |
| 550 | 29800 |
| basic | 577 | 51500 | 635 | 0.11 |
| **Genetically encodable pH indicators** | | | | | | | | | | |
| EGFP | NA | 480 | NR | 510 | NR | NR | 6.15 | 0.7 | NR | (Kneen et al., 1998) |
| EYFP | NA | 514 | NR | 527 | NR | NR | 7.1 | 1.1 | NR | (Llopis et al., 1998) |
| mNecterine | NA | 558 | NR | 578 | NR | NR | 6.9 | 0.78 | NR | (Johnson et al., 2009) |
| E2GFP | acidic | 424 | 31560 | 510 | 0.22 | NR | 7 | NR | NR | (Bizzarri et al., 2006) |
| basic | 401 | 28180 | 523 | 0.91 |  |
| 515 | 22400 | 527 | NR |  |
| dEGFP1 | acidic | 400 | 28700 | NR | NR | NR | 8.02 | NR | NR | (Hanson et al., 2002) |
| basic | 504 | 54800 | 516 | 0.49 |  |
| dEGFP2 | acidic | 398 | 21700 | NR | NR | NR | 7.25 | NR | NR | (Hanson et al., 2002) |
| basic | 496 | 38200 | 517 | 0.55 |  |
| dEGFP3 | acidic | 396 | 26700 | NR | NR | NR | 6.86 | NR | NR | (Hanson et al., 2002) |
| basic | 508 | 45900 | 518 | 0.57 |  |
| dEGFP4 | acidic | 400 | 26900 | NR | NR | NR | 7.37 | NR | NR | (Hanson et al., 2002) |
| basic | 509 | 50800 | 518 | 0.27 |  |
| r-pHluorin | NA | 395 | NR | 508 | NR | NR | NR | NR | -0.8 (pH 5.5–7.5) | (Miesenböck et al., 1998) |
| 475 | NR |  |
| e-pHluorin | NA | 395 | NR | 508 | NR | NR | NR | NR | 5 (pH 6–7.5) | (Miesenböck et al., 1998) |
| pHRed | NA | 440 | NR | 610 | NR | NR | 6.5 | NR | >9 | (Tantama et al., 2011) |
| pHTomato | NA | 550 | NR | 580 | NR | NR | 7.8 | NR | >2 (pH 7.5–9.8) | (Li and Tsien, 2012) |
| pHuji | NA | 556 | 31000 | 598 | 0.22 | NR | 7.7 | NR | 21 (pH 5.5–7.5) | (Shen et al., 2014; Liu et al., 2021) |
| SE-pHluorin | NA | 495 | 45000 | 512 | 0.52 | NR | 7.2 | 1.90 | 49 (pH 5.5–7.5) | (Sankaranarayanan et al., 2000; Shen et al., 2014; Liu et al., 2021) |
| pHoran1 | NA | 547 | NR | 564 | NR | NR | 6.7 | 0.87 | 9 (pH 5.5–7.5) | (Shen et al., 2014) |
| pHoran2 | NA | 549 | NR | 563 | NR | NR | 7.0 | 0.89 | 11 (pH 5.5–7.5) | (Shen et al., 2014) |
| pHoran3 | NA | 551 | NR | 566 | NR | NR | 7.4 | 0.87 | 14 (pH 5.5–7.5) | (Shen et al., 2014) |
| pHoran4 | NA | 547 | NR | 561 | NR | NR | 7.5 | 0.92 | 16 (pH 5.5–7.5) | (Shen et al., 2014) |
| pHmScarlet | NA | 562 | 85000 | 585 | 0.47 | NR | 7.4 | 1.1 | 26 (pH 5.5–7.5) | (Liu et al., 2021) |

Supplementary Table S4. Physical properties of genetically encodable Cl- indicators.

The parameters listed are peak absorbance wavelength (λabs), extinction coefficient (EC), peak emission wavelength (λem), quantum yield (QY), brightness (the product of EC and QY), dissociation constant (*K*d), Hill coefficient (nH), *in vitro* dynamic range (∆*R*/*R*0 for Clomeleon and SuperClomeleon, and ∆*F*/*F*0 for others; negative sign indicates inverse indicators), and acid dissociation constant (p*K*a). Some parameters were provided at both Cl--free and Cl--rich states.

| name | Cl- | λabs (nm) | EC (M-1cm-1) | λem (nm) | QY | brightness (mM-1cm-1) | *K*d (mM) | nH | ∆*F*/*F*0  or ∆*R*/*R*0[[3]](#footnote-3) | p*K*a | References |
| --- | --- | --- | --- | --- | --- | --- | --- | --- | --- | --- | --- |
| mNeonGreen | - | 400 | NR | NR | NR | NR | 9.8 | 0.72 | 20 | 5.7 | (Tutol et al., 2019a) |
| 505 | 10021 | 520 | 0.18 | 1.80 |
| + | 400 | NR | NR | NR | NR | 4.7 |
| 505 | 26884 | 520 | 0.4 | 10.75 |
| YFP | / | 514 | NR | 527 | NR | NR | 777 | NR | -0.4 | NR | (Wachter and James Remington, 1999) |
| Clomeleon | / | NR | NR | NR | NR | NR | 167 | NR | -0.8 | NR | (Kuner and Augustine, 2000, 200) |
| SuperClomeleon | / | NR | NR | NR | NR | NR | 8.1 | NR | -0.9 | NR | (Grimley et al., 2013) |
| YFP-H148Q | / | NR | 71000 | NR | 0.59 | NR | 100 | NR | -0.5 | 6.7 | (Jayaraman et al., 2000) |
| YFP-H148Q/I152L | / | NR | 52200 | NR | 0.6 | NR | 85 | NR | -0.5 | 6.92 | (Galietta et al., 2001) |
| phi-YFP | - | 480 | NR | 540 | 0.44 | NR | 384 | 0.9 | 2.5 | 4.9 | (Tutol et al., 2019b) |
| 400 | NR | 540 | 0.02 | NR |
| + | 480 | NR | 540 | 0.49 | NR | 5.4 |
| 400 | NR | 540 | 0.06 | NR |

**References**

Akerboom, J., Carreras Calderón, N., Tian, L., Wabnig, S., Prigge, M., Tolö, J., et al. (2013). Genetically Encoded Calcium Indicators for Multi-color Neural Activity Imaging and Combination with Optogenetics. *Front. Mol. Neurosci.* 6. doi:10.3389/fnmol.2013.00002.

Akerboom, J., Chen, T.-W., Wardill, T. J., Tian, L., Marvin, J. S., Mutlu, S., et al. (2012). Optimization of a GCaMP Calcium Indicator for Neural Activity Imaging. *J. Neurosci.* 32, 13819–13840. doi:10.1523/JNEUROSCI.2601-12.2012.

Baird, G. S., Zacharias, D. A., and Tsien, R. Y. (1999). Circular Permutation and Receptor Insertion within Green Fluorescent Proteins. *PNAS* 96, 11241–11246. doi:10.1073/pnas.96.20.11241.

Bizzarri, R., Arcangeli, C., Arosio, D., Ricci, F., Faraci, P., Cardarelli, F., et al. (2006). Development of a Novel GFP-based Ratiometric Excitation and Emission pH Indicator for Intracellular Studies. *Biophysical Journal* 90, 3300–3314. doi:10.1529/biophysj.105.074708.

Chen, T.-W., Wardill, T. J., Sun, Y., Pulver, S. R., Renninger, S. L., Baohan, A., et al. (2013). Ultrasensitive Fluorescent Proteins for Imaging Neuronal Activity. *Nature* 499, 295–300. doi:10.1038/nature12354.

Claflin, D. R., Morgan, D. L., Stephenson, D. G., and Julian, F. J. (1994). The Intracellular Ca2+ Transient and Tension in Frog Skeletal Muscle Fibres Measured with High Temporal Resolution. *J Physiol* 475, 319–325. doi:10.1113/jphysiol.1994.sp020072.

Csernoch, L., Bernengo, J. C., Szentesi, P., and Jacquemond, V. (1998). Measurements of Intracellular Mg2+ Concentration in Mouse Skeletal Muscle Fibers with the Fluorescent Indicator Mag-indo-1. *Biophys. J.* 75, 957–967. doi:10.1016/S0006-3495(98)77584-8.

Dana, H., Mohar, B., Sun, Y., Narayan, S., Gordus, A., Hasseman, J. P., et al. (2016). Sensitive Red Protein Calcium Indicators For Imaging Neural Activity. *Elife* 5. doi:10.7554/eLife.12727.

Dana, H., Sun, Y., Mohar, B., Hulse, B. K., Kerlin, A. M., Hasseman, J. P., et al. (2019). High-performance Calcium Sensors for Imaging Activity in Neuronal Populations and Microcompartments. *Nature Methods* 16, 649–657. doi:10.1038/s41592-019-0435-6.

Fujii, T., Shindo, Y., Hotta, K., Citterio, D., Nishiyama, S., Suzuki, K., et al. (2014). Design and Synthesis of a FlAsH-Type Mg2+ Fluorescent Probe for Specific Protein Labeling. *J. Am. Chem. Soc.* 136, 2374–2381. doi:10.1021/ja410031n.

Galietta, L. J. V., Haggie, P. M., and Verkman, A. S. (2001). Green Fluorescent Protein-Based Halide Indicators with Improved Chloride and Iodide Affinities. *FEBS Letters* 499, 220–224. doi:10.1016/S0014-5793(01)02561-3.

Grimley, J. S., Li, L., Wang, W., Wen, L., Beese, L. S., Hellinga, H. W., et al. (2013). Visualization of Synaptic Inhibition with an Optogenetic Sensor Developed by Cell-Free Protein Engineering Automation. *J. Neurosci.* 33, 16297–16309. doi:10.1523/JNEUROSCI.4616-11.2013.

Hanson, G. T., McAnaney, T. B., Park, E. S., Rendell, M. E. P., Yarbrough, D. K., Chu, S., et al. (2002). Green Fluorescent Protein Variants as Ratiometric Dual Emission pH Sensors. 1. Structural Characterization and Preliminary Application. *Biochemistry* 41, 15477–15488. doi:10.1021/bi026609p.

Illner, H., McGuigan, J. A. S., and Lüthi, D. (1992). Evaluation of Mag-fura-5, the New Fluorescent Indicator for Free Magnesium Measurements. *Pflügers Arch* 422, 179–184. doi:10.1007/BF00370418.

Inoue, M., Takeuchi, A., Horigane, S., Ohkura, M., Gengyo-Ando, K., Fujii, H., et al. (2015). Rational Design of a High-Affinity, Fast, Red Calcium Indicator R-CaMP2. *Nat. Methods* 12, 64–70. doi:10.1038/nmeth.3185.

Inoue, M., Takeuchi, A., Manita, S., Horigane, S., Sakamoto, M., Kawakami, R., et al. (2019). Rational Engineering of XCaMPs, a Multicolor GECI Suite for *In Vivo* Imaging of Complex Brain Circuit Dynamics. *Cell* 177, 1346-1360.e24. doi:10.1016/j.cell.2019.04.007.

Jayaraman, S., Haggie, P., Wachter, R. M., Remington, S. J., and Verkman, A. S. (2000). Mechanism and Cellular Applications of a Green Fluorescent Protein-Based Halide Sensor. *J. Biol. Chem.* 275, 6047–6050. doi:10.1074/jbc.275.9.6047.

Johnson, D. E., Ai, H.-W., Wong, P., Young, J. D., Campbell, R. E., and Casey, J. R. (2009). Red Fluorescent Protein pH Biosensor to Detect Concentrative Nucleoside Transport. *J. Biol. Chem.* 284, 20499–20511. doi:10.1074/jbc.M109.019042.

Kneen, M., Farinas, J., Li, Y., and Verkman, A. S. (1998). Green Fluorescent Protein as a Noninvasive Intracellular pH Indicator. *Biophys J* 74, 1591–1599.

Kuner, T., and Augustine, G. J. (2000). A Genetically Encoded Ratiometric Indicator for Chloride: Capturing Chloride Transients in Cultured Hippocampal Neurons. *Neuron* 27, 447–459. doi:10.1016/s0896-6273(00)00056-8.

Lee, S., Lee, H. G., and Kang, S. H. (2009). Real-Time Observations of Intracellular Mg2+ Signaling and Waves in a Single Living Ventricular Myocyte Cell. *Anal. Chem.* 81, 538–542. doi:10.1021/ac8013324.

Li, Y., and Tsien, R. W. (2012). pHTomato: A Genetically-Encoded Indicator That Enables Multiplex Interrogation of Synaptic Activity. *Nat Neurosci* 15, 1047–1053. doi:10.1038/nn.3126.

Liu, A., Huang, X., He, W., Xue, F., Yang, Y., Liu, J., et al. (2021). pHmScarlet Is a pH-Sensitive Red Fluorescent Protein to Monitor Exocytosis Docking and Fusion Steps. *Nat Commun* 12, 1413. doi:10.1038/s41467-021-21666-7.

Llopis, J., McCaffery, J. M., Miyawaki, A., Farquhar, M. G., and Tsien, R. Y. (1998). Measurement of Cytosolic, Mitochondrial, and Golgi pH in Single Living Cells with Green Fluorescent Proteins. *PNAS* 95, 6803–6808. doi:10.1073/pnas.95.12.6803.

Meuwis, K., Boens, N., Gallay, J., and Vincent, M. (1998). Photophysics of Mag-fura-2: A Fluorescent Indicator for Intracellular Mg2+. *Chemical Physics Letters* 287, 412–420. doi:10.1016/S0009-2614(98)00178-X.

Miesenböck, G., De Angelis, D. A., and Rothman, J. E. (1998). Visualizing Secretion and Synaptic Transmission with pH-Sensitive Green Fluorescent Proteins. *Nature* 394, 192–195. doi:10.1038/28190.

Nagai, T., Sawano, A., Park, E. S., and Miyawaki, A. (2001). Circularly Permuted Green Fluorescent Proteins Engineered to Sense Ca2+. *PNAS* 98, 3197–3202. doi:10.1073/pnas.051636098.

Nakai, J., Ohkura, M., and Imoto, K. (2001). A High Signal-To-Noise Ca2+ Probe Composed of a Single Green Fluorescent Protein. *Nature Biotechnology* 19, 137–141. doi:10.1038/84397.

Ohkura, M., Matsuzaki, M., Kasai, H., Imoto, K., and Nakai, J. (2005). Genetically Encoded Bright Ca2+ Probe Applicable for Dynamic Ca2+ Imaging of Dendritic Spines. *Anal. Chem.* 77, 5861–5869. doi:10.1021/ac0506837.

Qian, Y., Cosio, D. M. O., Piatkevich, K. D., Aufmkolk, S., Su, W.-C., Celiker, O. T., et al. (2020). Improved Genetically Encoded Near-Infrared Fluorescent Calcium Ion Indicators for *in Vivo* Imaging. *PLOS Biology* 18, e3000965. doi:10.1371/journal.pbio.3000965.

Qian, Y., Piatkevich, K. D., McLarney, B., Abdelfattah, A. S., Mehta, S., Murdock, M. H., et al. (2019). A Genetically Encoded Near-Infrared Fluorescent Calcium Ion Indicator. *Nat Methods* 16, 171–174. doi:10.1038/s41592-018-0294-6.

Raju, B., Murphy, E., Levy, L. A., Hall, R. D., and London, R. E. (1989). A Fluorescent Indicator for Measuring Cytosolic Free Magnesium. *Am. J. Physiol. Cell Physiol.* 256, C540–C548. doi:10.1152/ajpcell.1989.256.3.C540.

Rink, T. J., Tsien, R. Y., and Pozzan, T. (1982). Cytoplasmic pH and Free Mg2+ in Lymphocytes. *J. Cell Biol.* 95, 189–196. doi:10.1083/jcb.95.1.189.

Sankaranarayanan, S., De Angelis, D., Rothman, J. E., and Ryan, T. A. (2000). The Use of pHluorins for Optical Measurements of Presynaptic Activity. *Biophys. J.* 79, 2199–2208. doi:10.1016/S0006-3495(00)76468-X.

Shen, Y., Dana, H., Abdelfattah, A. S., Patel, R., Shea, J., Molina, R. S., et al. (2018). A Genetically Encoded Ca2+ Indicator Based on Circularly Permutated Sea Anemone Red Fluorescent Protein eqFP578. *BMC Biol.* 16, 9. doi:10.1186/s12915-018-0480-0.

Shen, Y., Rosendale, M., Campbell, R. E., and Perrais, D. (2014). pHuji, a PH-Sensitive Red Fluorescent Protein for Imaging of Exo- And Endocytosis. *J. Cell Biol.* 207, 419–432. doi:10.1083/jcb.201404107.

Shmigol, A. V., Eisner, D. A., and Wray, S. (2001). Simultaneous Measurements of Changes in Sarcoplasmic Reticulum and Cytosolic [Ca2+] in Rat Uterine Smooth Muscle Cells. *J. Physiol.* 531, 707–713. doi:10.1111/j.1469-7793.2001.0707h.x.

Subach, O. M., Sotskov, V. P., Plusnin, V. V., Gruzdeva, A. M., Barykina, N. V., Ivashkina, O. I., et al. (2020). Novel Genetically Encoded Bright Positive Calcium Indicator NCaMP7 Based on the mNeonGreen Fluorescent Protein. *Int J Mol Sci* 21. doi:10.3390/ijms21051644.

Tallini, Y. N., Ohkura, M., Choi, B.-R., Ji, G., Imoto, K., Doran, R., et al. (2006). Imaging Cellular Signals in the Heart *in Vivo*: Cardiac Expression of the High-Signal Ca2+ Indicator GCaMP2. *PNAS* 103, 4753–4758. doi:10.1073/pnas.0509378103.

Tantama, M., Hung, Y. P., and Yellen, G. (2011). Imaging Intracellular pH in Live Cells with a Genetically Encoded Red Fluorescent Protein Sensor. *J. Am. Chem. Soc.* 133, 10034–10037. doi:10.1021/ja202902d.

Tian, L., Hires, S. A., Mao, T., Huber, D., Chiappe, M. E., Chalasani, S. H., et al. (2009). Imaging Neural Activity in Worms, Flies and Mice with Improved GCaMP Calcium Indicators. *Nat. Methods* 6, 875–881. doi:10.1038/nmeth.1398.

Tutol, J. N., Kam, H. C., and Dodani, S. C. (2019a). Identification of mNeonGreen as a pH-Dependent, Turn-On Fluorescent Protein Sensor for Chloride. *ChemBioChem* 20, 1759–1765. doi:10.1002/cbic.201900147.

Tutol, J. N., Peng, W., and Dodani, S. C. (2019b). Discovery and Characterization of a Naturally Occurring, Turn-On Yellow Fluorescent Protein Sensor for Chloride. *Biochemistry* 58, 31–35. doi:10.1021/acs.biochem.8b00928.

Wachter, R. M., and James Remington, S. (1999). Sensitivity of the Yellow Variant of Green Fluorescent Protein to Halides and Nitrate. *Curr. Biol.* 9, R628–R629. doi:10.1016/S0960-9822(99)80408-4.

Whitaker, J. E., Haugland, R. P., and Prendergast, F. G. (1991). Spectral and Photophysical Studies of Benzo[c]xanthene Dyes: Dual Emission pH Sensors. *Anal. Biochem.* 194, 330–344. doi:10.1016/0003-2697(91)90237-n.

Wu, J., Abdelfattah, A. S., Miraucourt, L. S., Kutsarova, E., Ruangkittisakul, A., Zhou, H., et al. (2014). A Long Stokes Shift Red Fluorescent Ca2+ Indicator Protein for Two-Photon and Ratiometric Imaging. *Nat Commun* 5. doi:10.1038/ncomms6262.

Wu, J., Liu, L., Matsuda, T., Zhao, Y., Rebane, A., Drobizhev, M., et al. (2013). Improved Orange and Red Ca2+ Indicators and Photophysical Considerations for Optogenetic Applications. *ACS Chem Neurosci* 4, 963–972. doi:10.1021/cn400012b.

Zarowny, L., Aggarwal, A., Rutten, V. M. S., Kolb, I., Patel, R., Huang, H.-Y., et al. (2020). Bright and High-Performance Genetically Encoded Ca2+ Indicator Based on mNeonGreen Fluorescent Protein. *ACS Sens.* 5, 1959–1968. doi:10.1021/acssensors.0c00279.

Zhang, Y., Rózsa, M., Liang, Y., Bushey, D., Wei, Z., Zheng, J., et al. (2021). Fast and sensitive GCaMP calcium indicators for imaging neural populations. doi:10.1101/2021.11.08.467793.

Zhao, M., Hollingworth, S., and Baylor, S. M. (1996). Properties of Tri- And Tetracarboxylate Ca2+ Indicators in Frog Skeletal Muscle Fibers. *Biophys. J.* 70, 896–916. doi:10.1016/S0006-3495(96)79633-9.

Zhao, Y., Araki, S., Wu, J., Teramoto, T., Chang, Y.-F., Nakano, M., et al. (2011). An Expanded Palette of Genetically Encoded Ca2+ Indicators. *Science* 333, 1888–1891. doi:10.1126/science.1208592.

1. ∆*R*/*R*0for ratiometric-pericam, GEM-GECO1, GEX-GECO1, and REX-GECO1 [↑](#footnote-ref-1)
2. ∆*R*/*R*0 for r-pHluorin [↑](#footnote-ref-2)
3. ∆*R*/*R*0 for Clomeleon and SuperClomeleon [↑](#footnote-ref-3)
